# Supplementary material
Source: PubMed Central journal article supplement (PMC3207642)

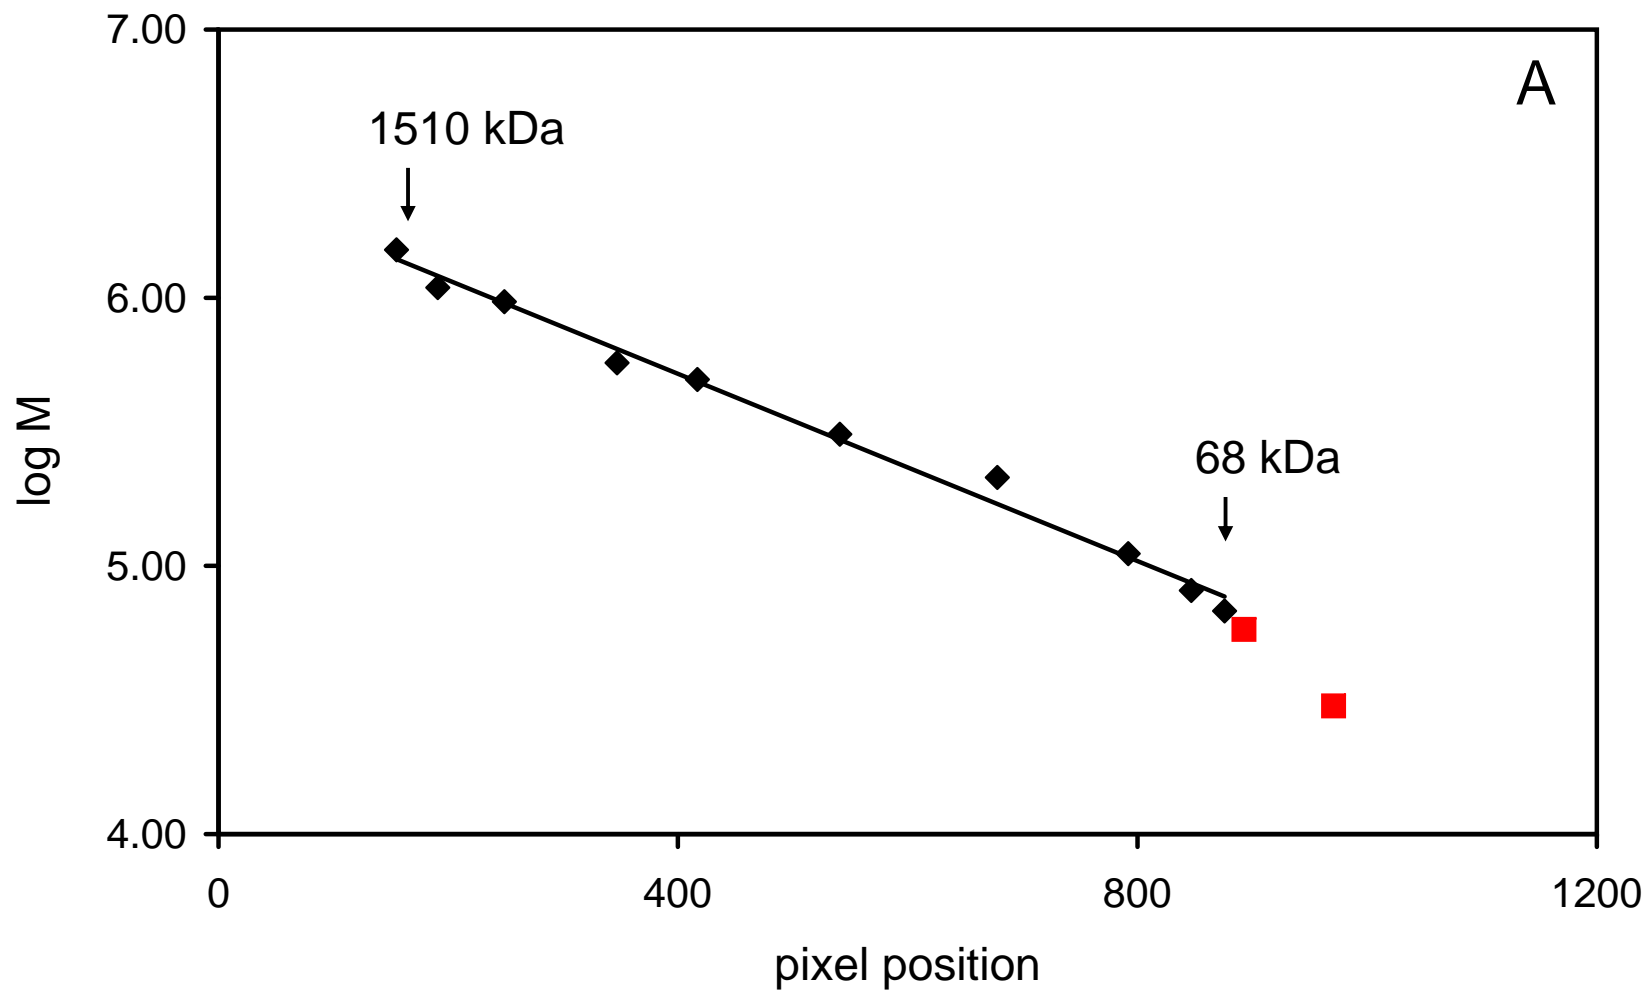

Supplement: NIHMS309869-supplement-02__fig_2A.pdf [file NIHMS309869-supplement-02__fig_2A.pdf]
